# Supplementary material for: Synthesis of CuSe/PVP/GO and CuSe/MWCNTs for their applications as nonenzymatic electrochemical glucose biosensors
Source: Royal Society of Chemistry journal article supplement (doi:10.1039/d3ra06713k), 2024-01-01
Supplement: d3ra06713k1.pdf [file d3ra06713k1.pdf]

**Supplementary information:**

**Synthesis of *CuSe/PVP/GO* and *CuSe/MWCNTs* for their Applications as Nonenzymatic Electrochemical Glucose Biosensor.**

Junaid Yaseen<sup>a</sup>, \*\*Farhat Saira<sup>b</sup>, Muhammad Imran<sup>c</sup>, Mehwish Fatima<sup>d</sup>, Hafiz Ejaz Ahmed<sup>a</sup>, Muhammad Zeewaqaar Manzoor<sup>a</sup>, Momna Rasheed<sup>a</sup>, Iqbal Nisa<sup>b</sup>, Khalid Mehmood<sup>c</sup> and \*Zahida Batool<sup>a</sup>

<sup>a</sup>*Institute of Physics, The Islamia University of Bahawalpur, Pakistan*

<sup>b</sup>*Nanoscience and Technology Development National Center for Physics (NCP)*

<sup>c</sup>*Chemistry Department, Faculty of Science, King Khalid University, P.O. Box 9004, Abha 6141, Saudi Arabia.*

<sup>d</sup>*Department of Physics, science unit, deanship of educational services, Qassim University, Saudi Arabia.*

<sup>e</sup>*Department of Physics, Government College University, Faisalabad*

\*Corresponding Authors: \* [zahida.batool@iub.edu.pk](mailto:zahida.batool@iub.edu.pk) (Zahida Batool),

\*\* [farhat.saira@ncp.edu.pk](mailto:farhat.saira@ncp.edu.pk) (Farhat Saira)

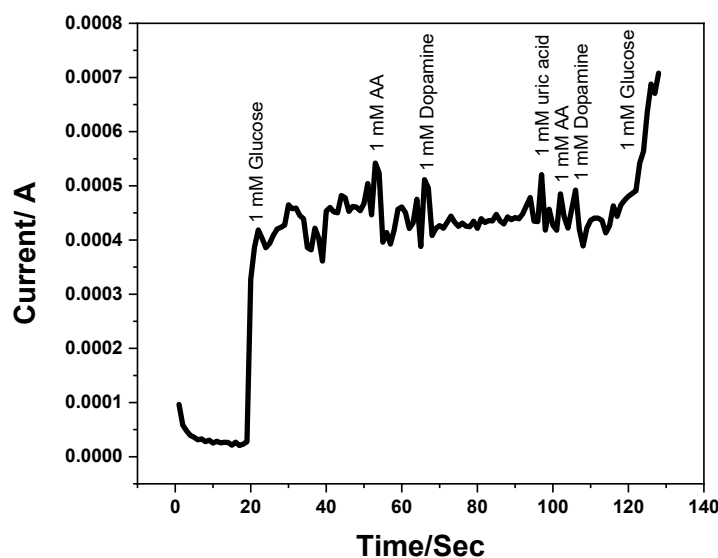

Figure S1: Chronoamperometry experiments conducted for glucose sensing in the presence of interferants.

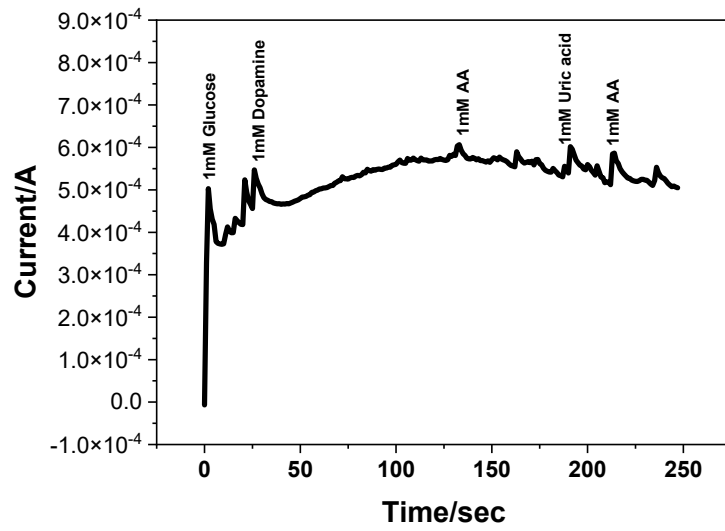

Figure S2: Chronoamperometry experiments conducted for glucose sensing in the presence of interferants.
